# Supplementary material for: Who is missed in a community-based survey: Assessment and implications of biases due to incomplete sampling frame in a community-based serosurvey, Choma and Ndola Districts, Zambia, 2022
Source: PubMed Central journal article supplement (PMC11057754; doi:10.1371/journal.pgph.0003072), 2024-04-29

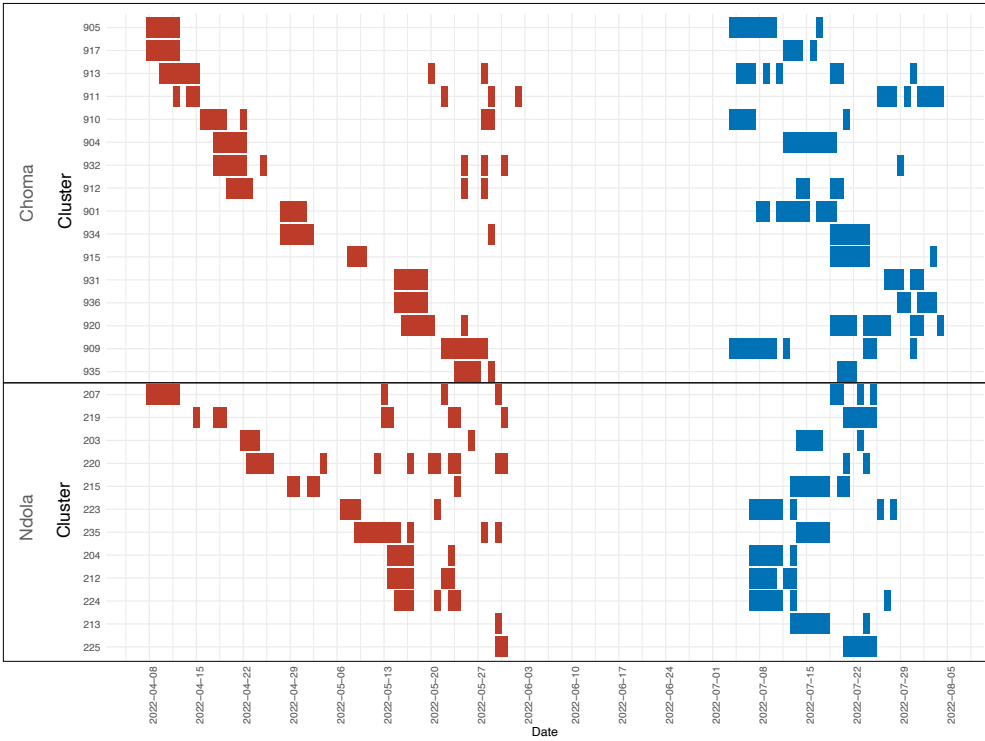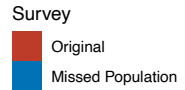

Supplement: pgph.0003072.s002.pdf [file pgph.0003072.s002.pdf]
